# Supplementary material for: Fetuin-A alleviates neuroinflammation against traumatic brain injury-induced microglial necroptosis by regulating Nrf-2/HO-1 pathway
Source: PubMed Central journal article supplement (PMC9636801; doi:10.1186/s12974-022-02633-5), 2022-11-04

A

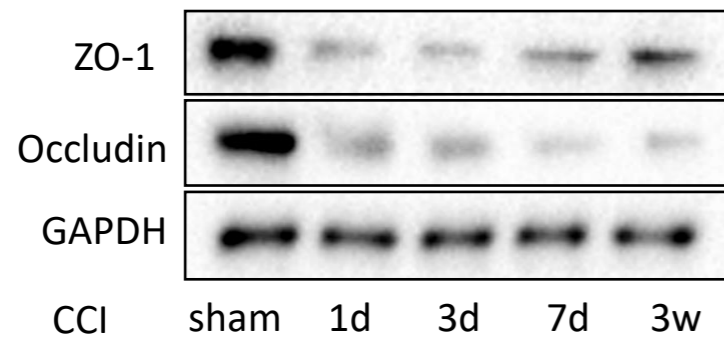

B

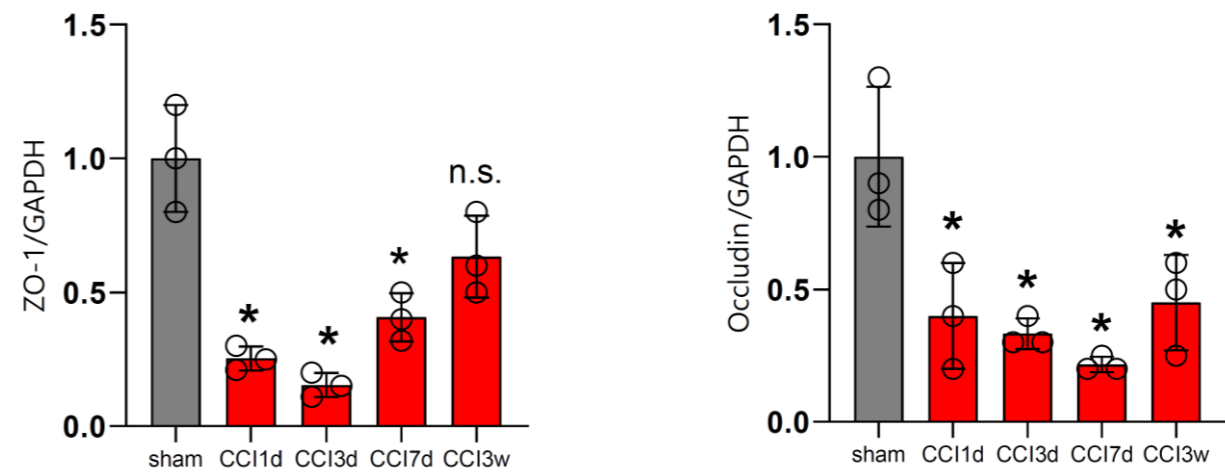

C

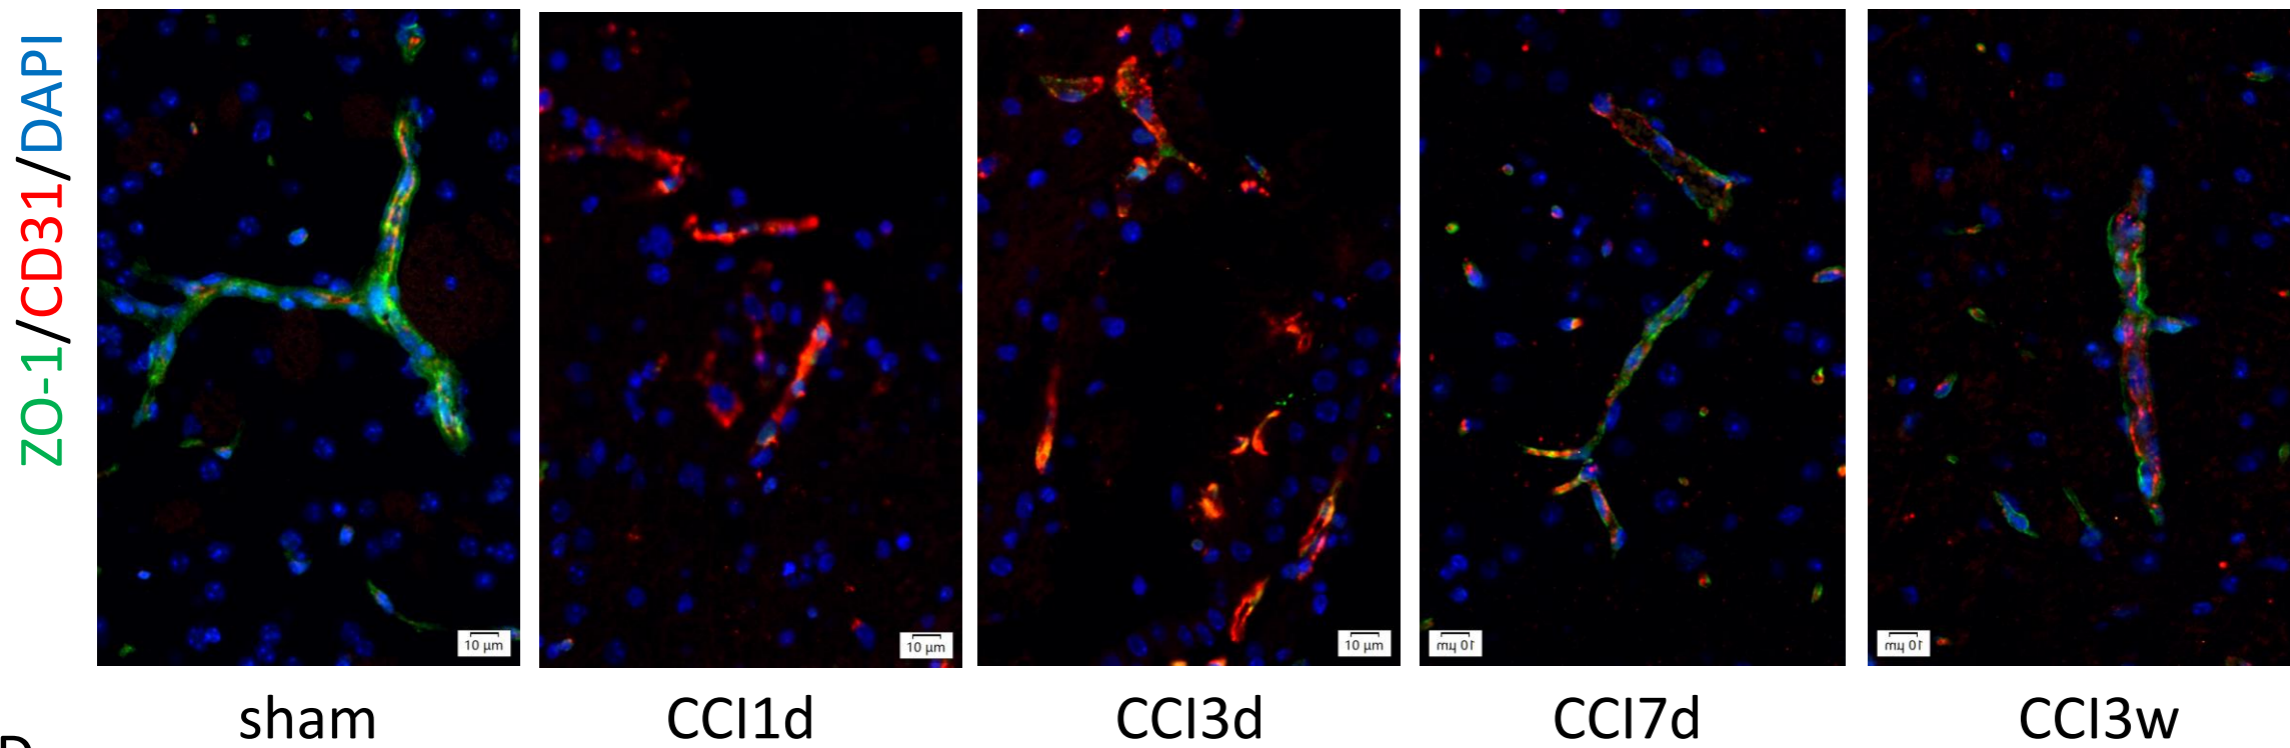

D

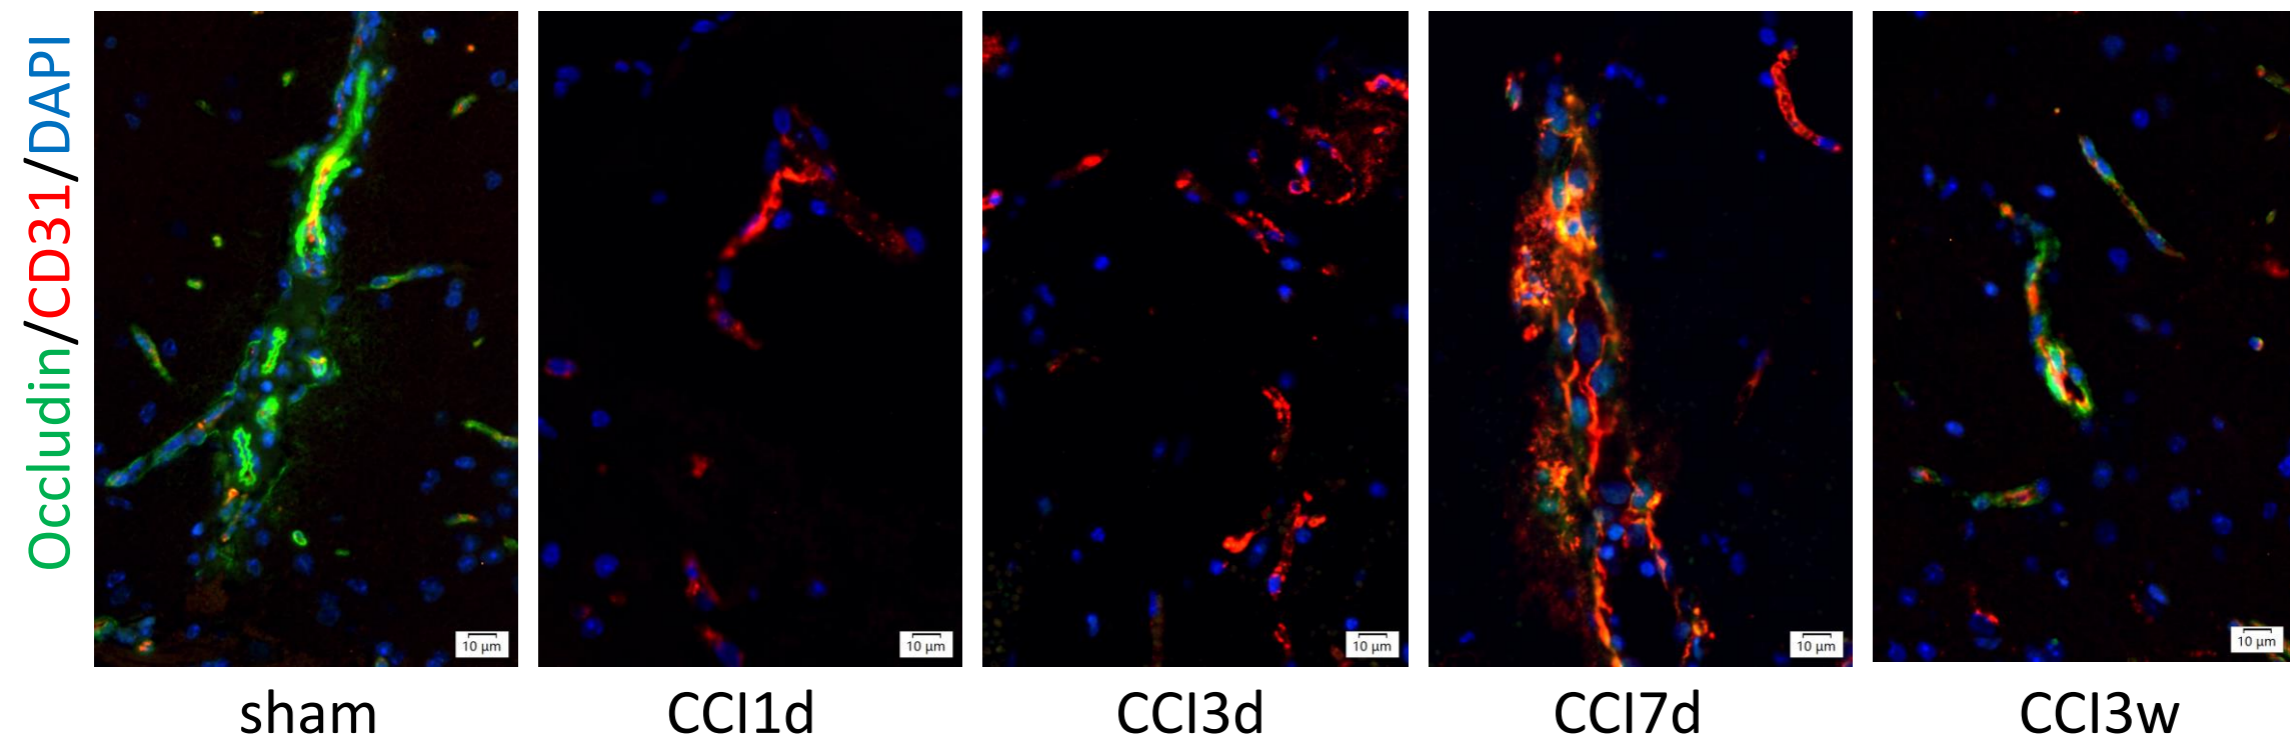

Supplement: 12974_2022_2633_MOESM2_ESM.pdf [file 12974_2022_2633_MOESM2_ESM.pdf]
